# Supplementary figures and images for: Missense mutations in the central domains of cardiac myosin binding protein-C and their potential contribution to hypertrophic cardiomyopathy
Source: PubMed Central journal article supplement — J Biol Chem. 2023 Nov 30;300(1):105511. doi: 10.1016/j.jbc.2023.105511 (PMC10772716; doi:10.1016/j.jbc.2023.105511), 2023-11-30

Figure S1

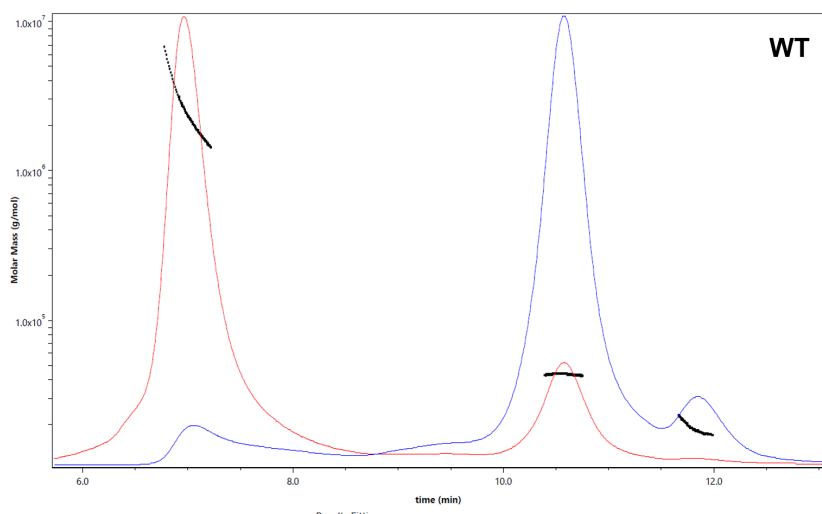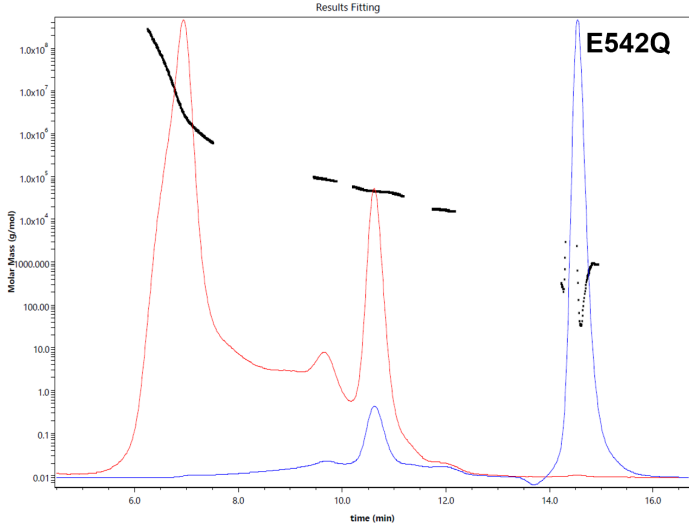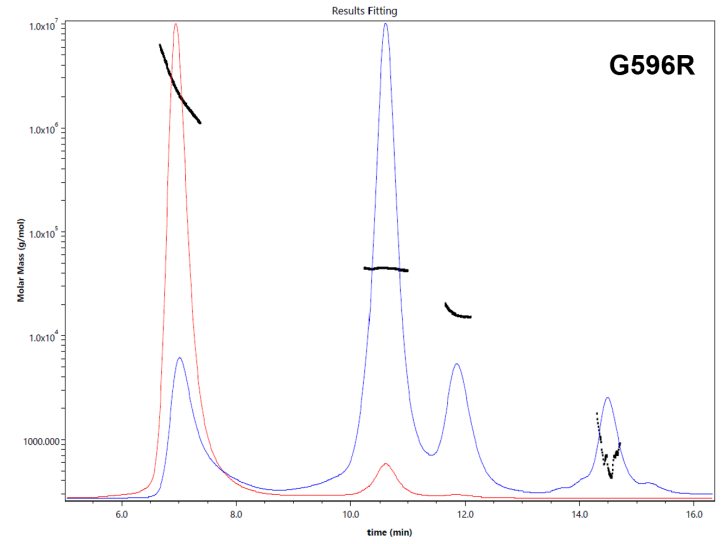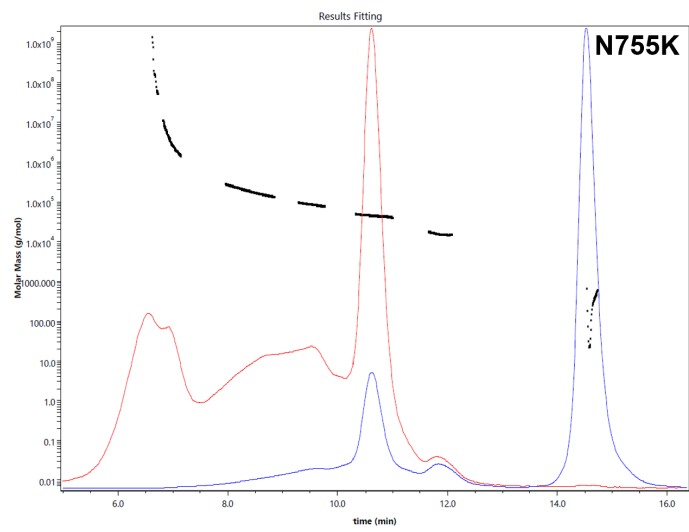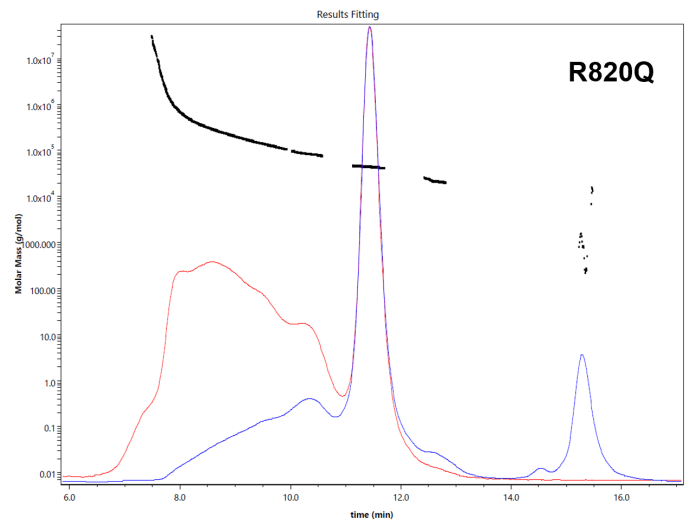

Supplement: mmc1.pdf [file mmc1.pdf]

[kDa]

**A**

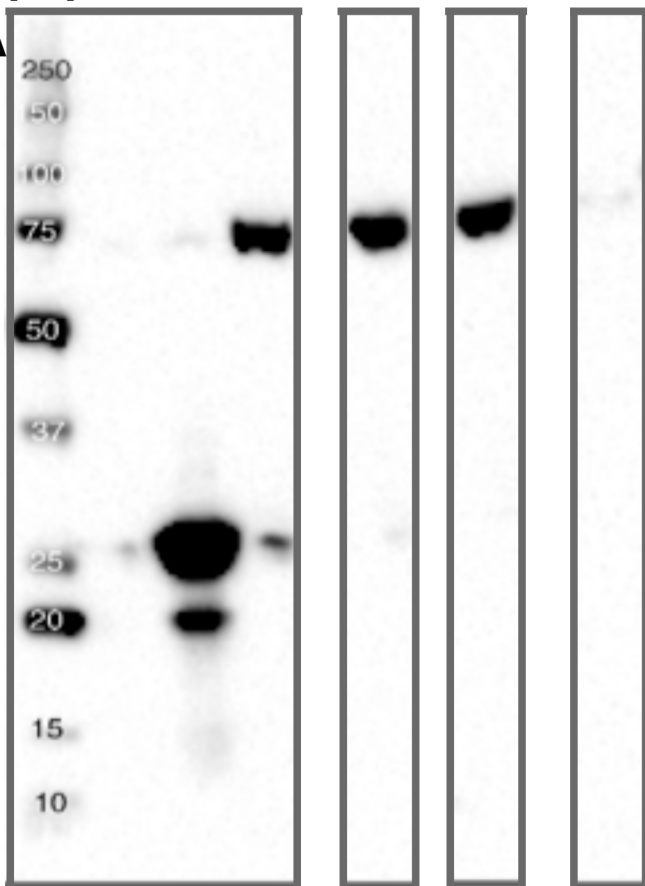

**B**

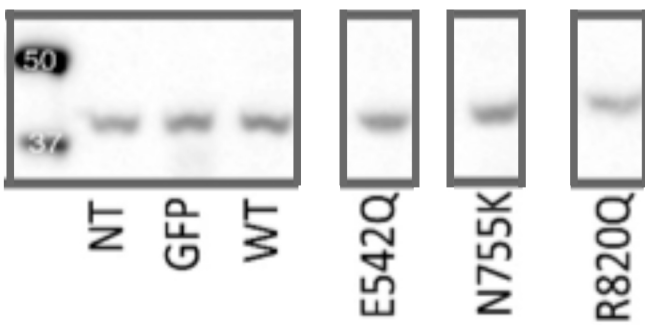

Supplement: mmc2.pdf [file mmc2.pdf]

Figure S3

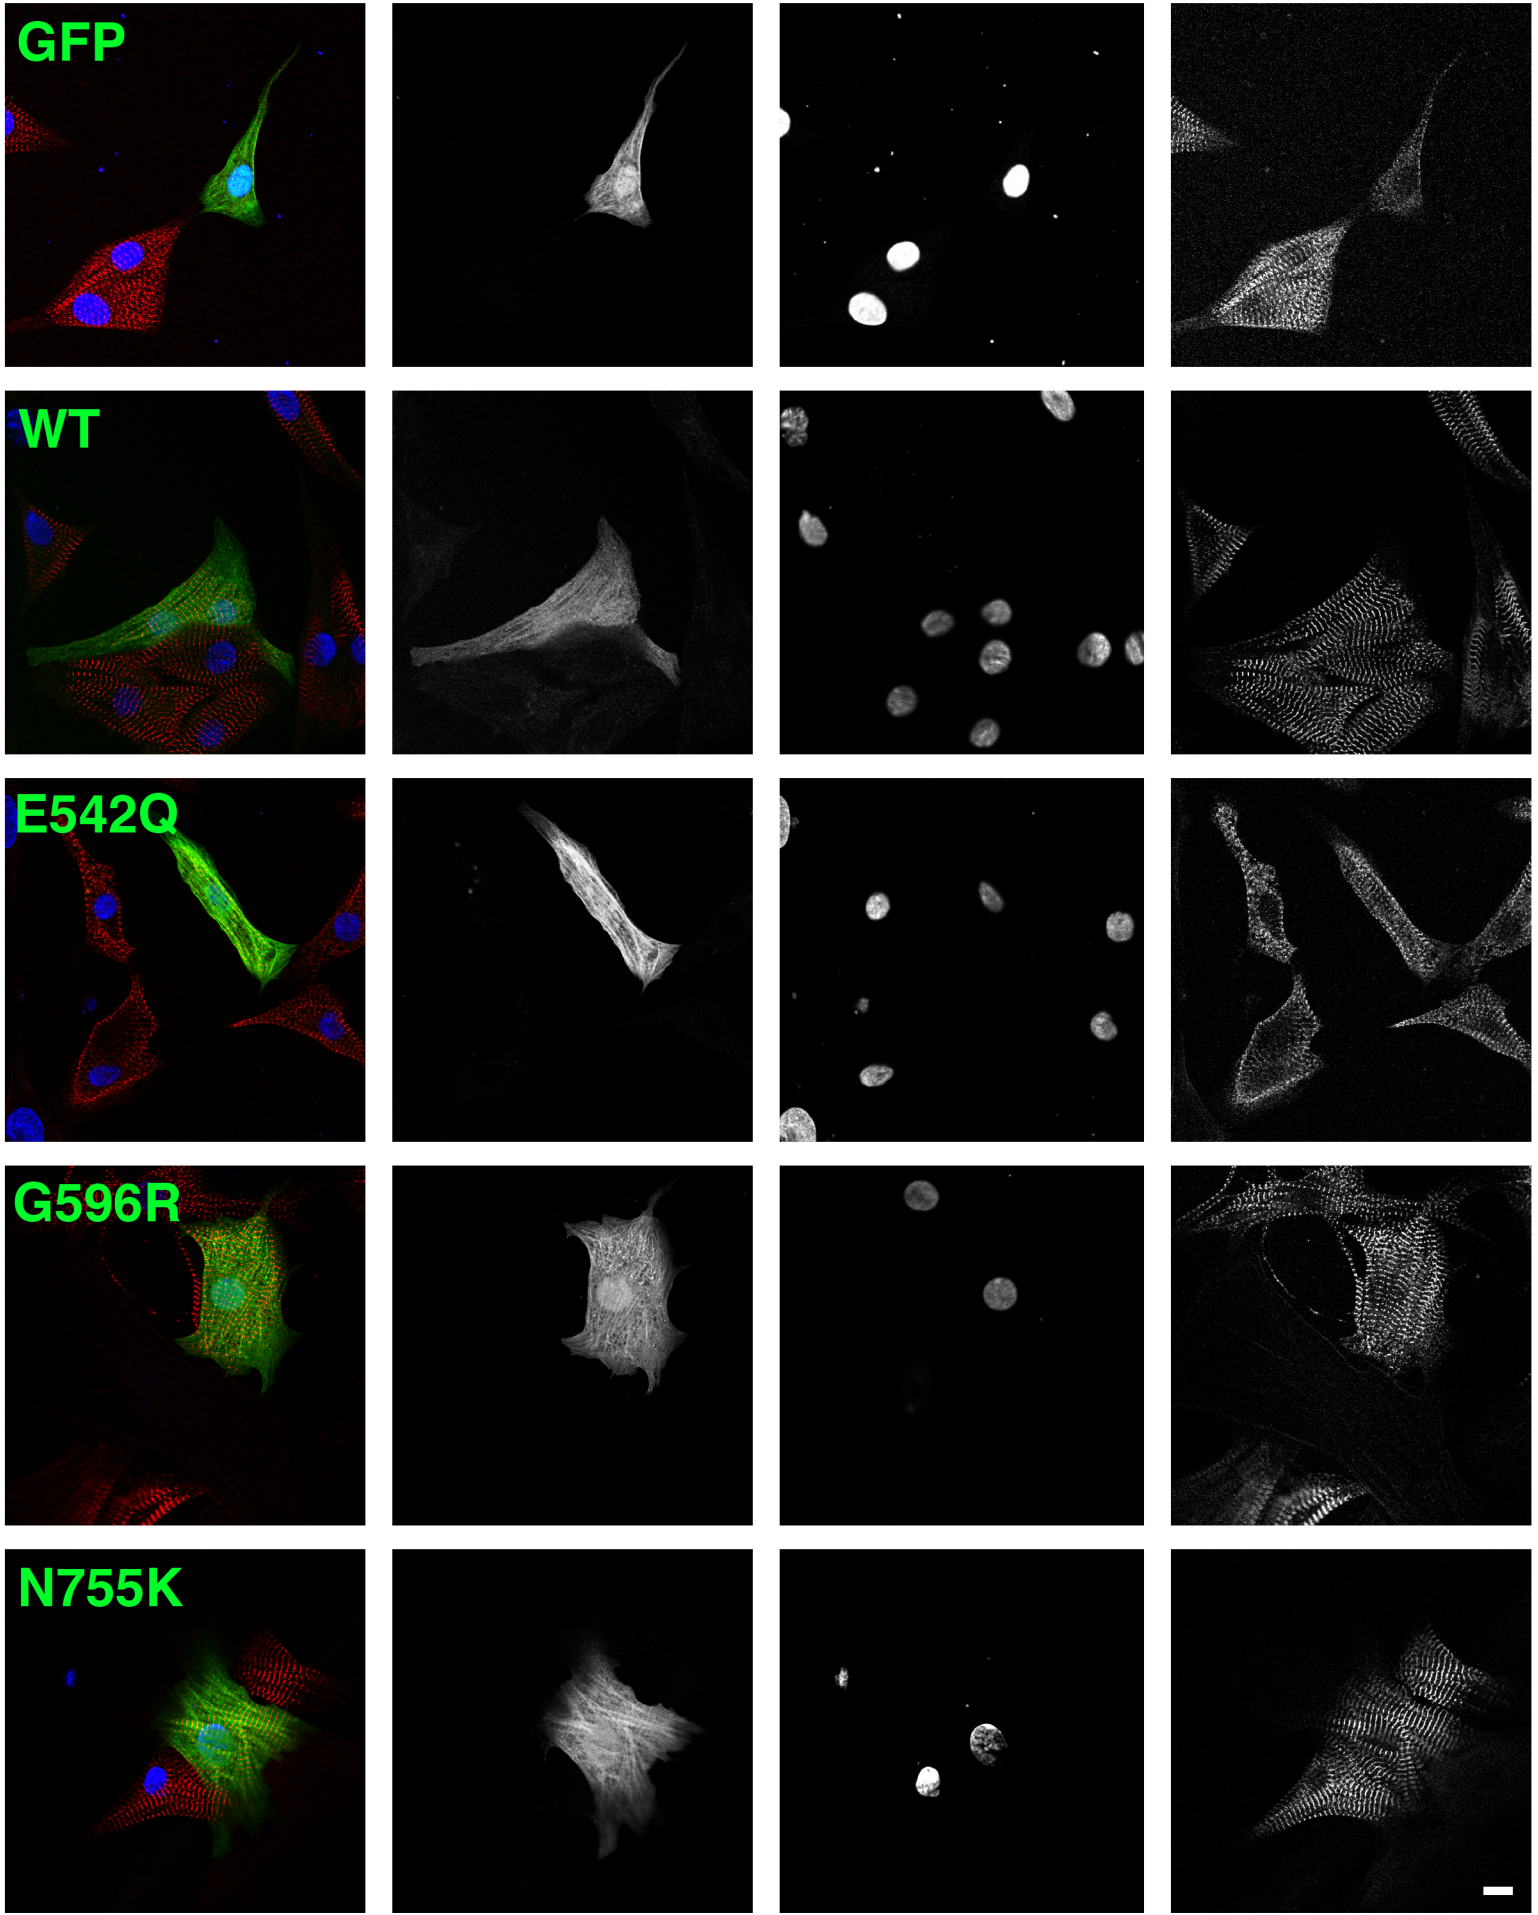

Supplement: mmc3.pdf [file mmc3.pdf]

Figure S4

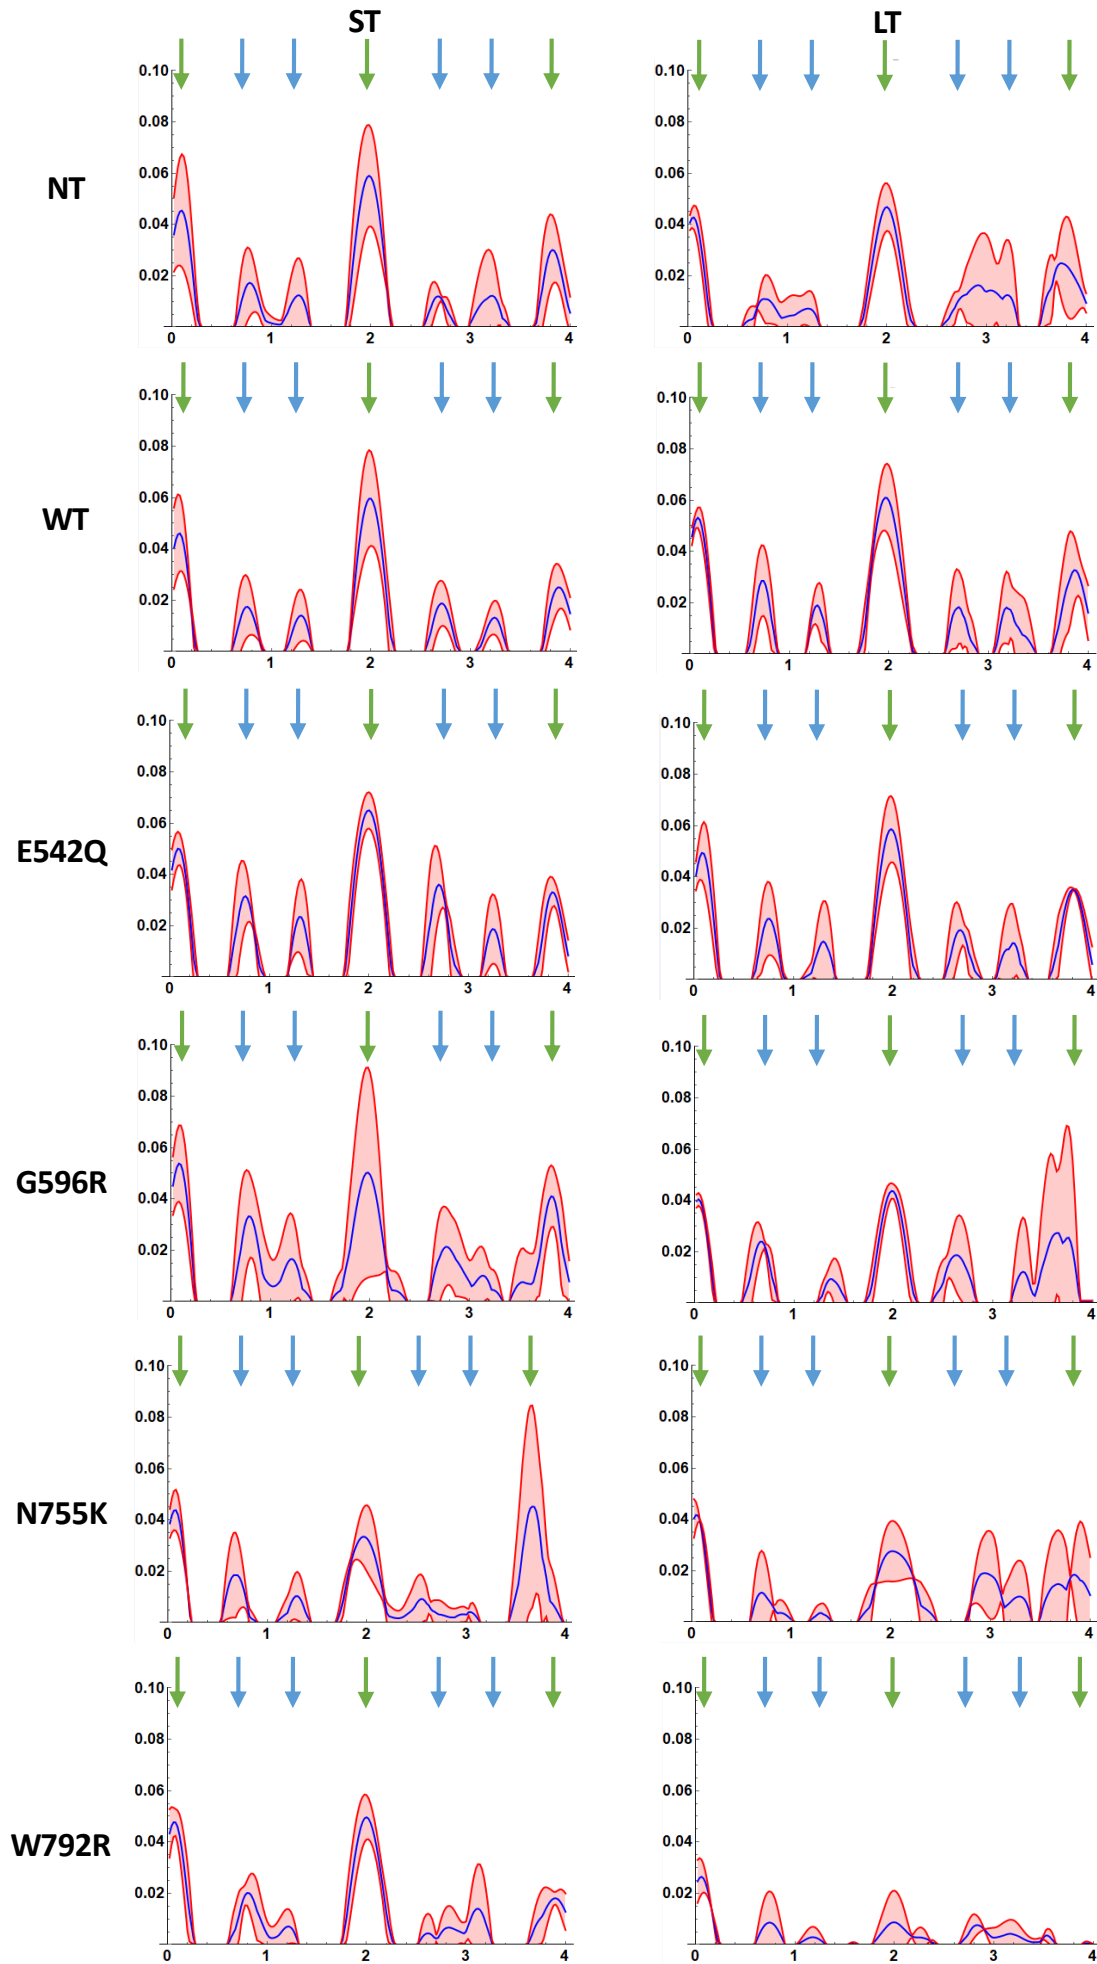

Supplement: mmc4.pdf [file mmc4.pdf]

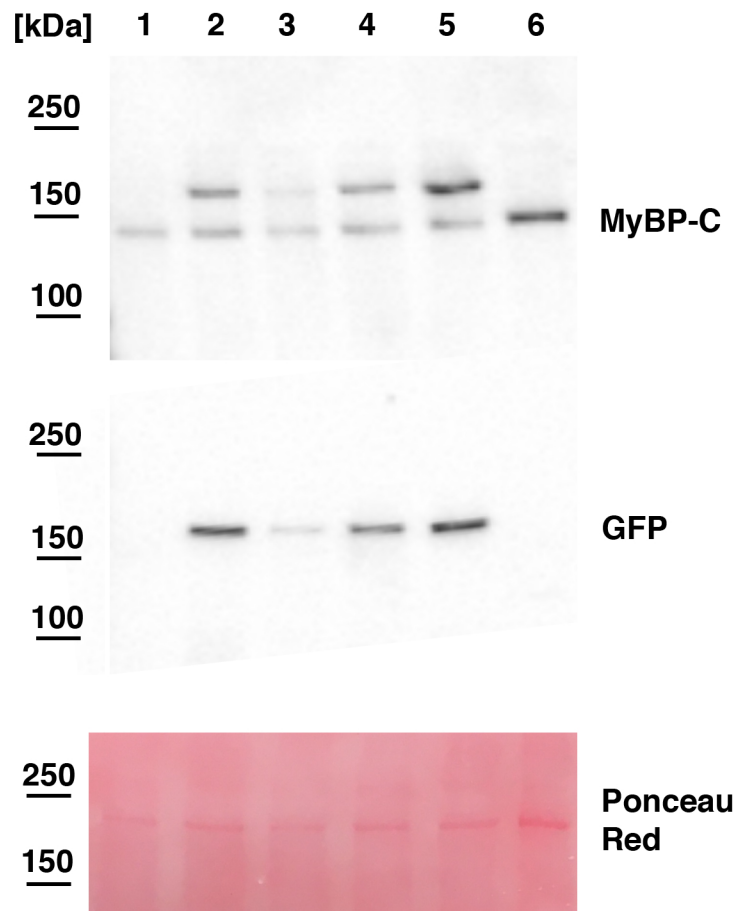

Supplement: mmc5.pdf [file mmc5.pdf]

Figure S6

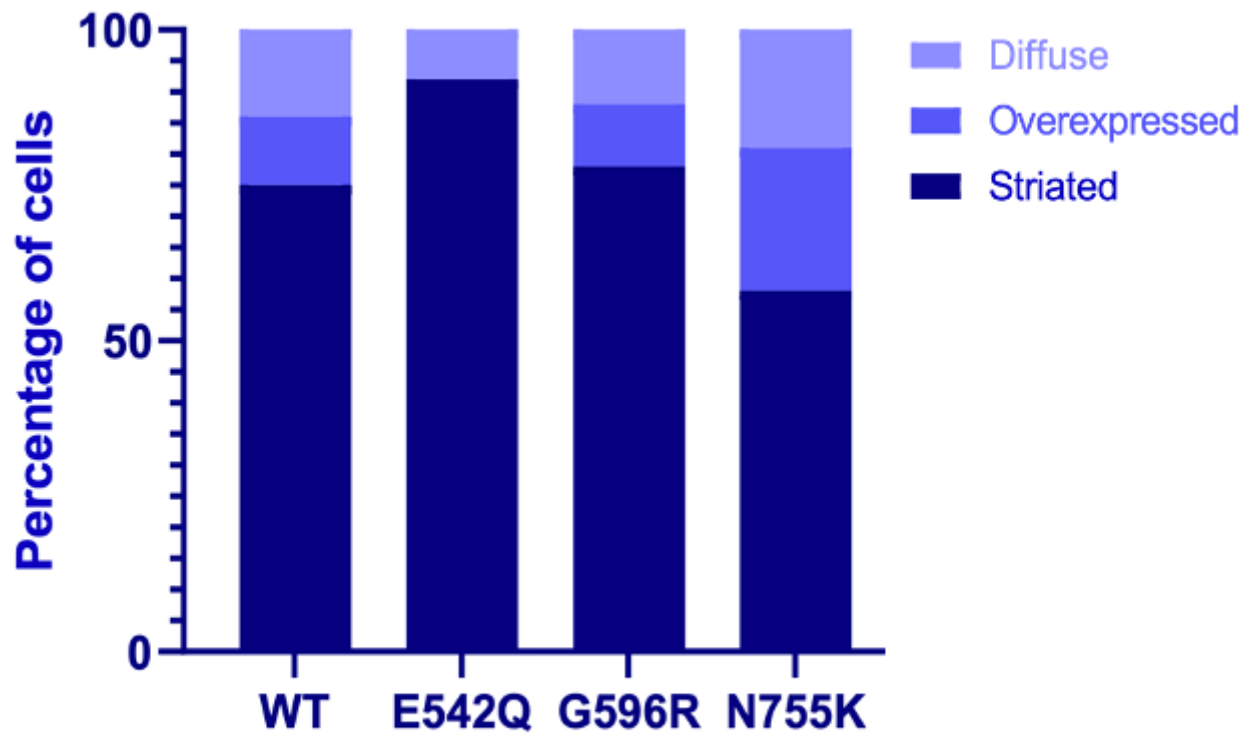

Supplement: mmc6.pdf [file mmc6.pdf]
